# Supplementary material for: Cross-sectional survey of treatment practices for urethritis at pharmacies, private clinics and government health facilities in coastal Kenya: many missed opportunities for HIV prevention
Source: PubMed Central journal article supplement — Sex Transm Infect. 2013 May 22;89(7):583–9. doi: 10.1136/sextrans-2012-050979 (PMC3812900; doi:10.1136/sextrans-2012-050979), 2013-05-22
Supplement: sextrans-2012-050979-s1.pdf [file sextrans-2012-050979-s1.pdf]

## **QUESTIONNAIRE FOR SURROGATE CLIENTS**

### **URETHRAL DISCHARGE**

Pharmacy code |\_|\_|\_|

Date of visit (dd/mm/yy) \_ \_ / \_ \_ / \_ \_

Initials of surrogate client |\_|\_|

Initials of Interviewer |\_|\_|

1. What is the gender of the pharmacy staff consulted?

**Male = 1**

**Female = 2**

2. After you complained to the pharmacy staff about the discharge from the penis, did he/she ask you whether you had other problems?

**No = 0**

**Yes = 1**

3. Did he/she ask you whether you have had such a problem before (urethral discharge)?

**No = 0**

**Yes = 1**

4. Did he/she ask when you first noticed the urethral discharge OR when the discharge started?

**No = 0**

**Yes = 1**

5. Did he/she ask to physically examine you?

**No = 0**

**Yes = 1**

6. Did he/she recommend a laboratory test?

**No = 0**

**Yes = 1**

7. Did he/she ask whether you had seen a doctor before going to the pharmacy?

**No = 0**

**Yes = 1**

8. Did he/she ask whether you had sexual intercourse before the symptoms appeared?

**No = 0**

**Yes = 1**

9. (a) Did he/she ask you whether you used condoms when you had sexual intercourse?

**No = 0**

**Yes = 1**

(b) If yes for [a] above, did he/she ask why you did not use condoms?

**No = 0**

**Yes = 1**

10. Did he/she recommend treatment by injection?

**No = 0**

**Yes = 1**

11. (a) Did he/she **(out of his/her initiative)** recommend any medicines for you to take?

**No = 0**

**Yes = 1 (Go to 11c.)**

(b) If no, did he/she **(after your request)** recommend any medicines for you to take?

**No = 0 (Go to question 16)**

**Yes = 1**

(c) What medicines were recommended? *(Interviewer to fill table as appropriate)*

| Medicine name | Dose | Frequency | Duration (days) | Cost (kshs) |
|---------------|------|-----------|-----------------|-------------|
|               |      |           |                 |             |
|               |      |           |                 |             |
|               |      |           |                 |             |
|               |      |           |                 |             |

12. What did he/she advise when you said you did not have enough money?

---

---

---

---

13.(a) Did he/she agree to write down for you the cost or quantities of the various medicines remaining?

**No = 0**

**Yes = 1**

(b) If yes, interviewer to fill table below as appropriate. *(Refer to the paper issued by the pharmacy staff/ what the client was told is the remainder)*

| Medicine name | Dose | Frequency | Duration (days) | Cost (kshs) |
|---------------|------|-----------|-----------------|-------------|
|               |      |           |                 |             |
|               |      |           |                 |             |
|               |      |           |                 |             |
|               |      |           |                 |             |

14. What was his/her response to the question "Will this medicine cure me?"

---

---

---

---

15. What was his/her response to the question "What should I do if I do not get better?"

---

---

---

---

**16.** Were you given instructions/advice regarding the following:

a. Completion of dose of recommended medicines?

**No = 0**

**Yes = 1**

b. Abstinence from sexual intercourse until cured?

**No = 0**

**Yes = 1**

c. Use of condoms during future sexual intercourse?

**No = 0**

**Yes = 1**

d. Treatment of sexual partner?

**No = 0**

**Yes = 1**

e. HIV testing?

**No = 0**

**Yes = 1**

**17.** What other instructions/advice were you given?

---

---

---

---

**18.** What other comments can you make about the visit? e.g. your general impression of the pharmacy, any interesting/funny incidences or questions, etc.

---

---

---

**---END---**
