# Supplementary material for: Cross-sectional survey of treatment practices for urethritis at pharmacies, private clinics and government health facilities in coastal Kenya: many missed opportunities for HIV prevention
Source: PubMed Central journal article supplement — Sex Transm Infect. 2013 May 22;89(7):583–9. doi: 10.1136/sextrans-2012-050979 (PMC3812900; doi:10.1136/sextrans-2012-050979), 2013-05-22
Supplement: sextrans-2012-050979-s3.pdf [file sextrans-2012-050979-s3.pdf]

## HEALTH FACILITY QUESTIONNAIRE

Provider ID |\_|\_|\_|

Initials of interviewer |\_|\_|

Date form filled (dd/mm/yy) \_\_\_/\_\_\_/\_\_\_

Starting time |\_|\_|\_|\_| hours

---

***Thank you for finding time for this interview. I would like to ask you some questions regarding general operations in your health facility and how you manage STDs...***

---

### **SECTION I: RESPONDENT'S CHARACTERISTICS**

***I will start with general questions about you...***

1. Gender:                      **Male = 1**                                      **Female = 2**
2. Age:                              |\_|\_| Years
3. (a) What is the highest level of formal education you have attained?  
***(Interviewer to fill table as appropriate)***

| <b>Level of education</b> | <b>Number of years</b> |
|---------------------------|------------------------|
| Primary                   |                        |
| Secondary                 |                        |
| Tertiary                  |                        |

- (b) What type of healthcare training have you gone through? ***(Interviewer to fill table as appropriate)***

| <b>Type of training</b> | <b>Level reached (certificate, diploma, higher diploma, bachelors, masters)</b> | <b>Years completed</b> |
|-------------------------|---------------------------------------------------------------------------------|------------------------|
| Pharmacy                |                                                                                 |                        |
| Clinical/ medical       |                                                                                 |                        |
| Laboratory              |                                                                                 |                        |
| Nursing                 |                                                                                 |                        |
| Others (Specify)        |                                                                                 |                        |

(c) What type of institution did you acquire the healthcare training from?

**Public = 1**

**Private = 2**

**Faith based organization = 3**

**Others (specify) = 4**

---

---

Name of institution *(if given)*

---

---

4. For how long have you worked in a clinical setting?

|\_|\_|\_| **Months**

5. (a) Are you a member of any professional association/ society?

**No = 0**

**Yes = 1**

(b) If yes for (a) what is the name of the association/ society?

---

---

6. (a) Have you attended any course on management of STDs since you started working in the clinical setting?

**No = 0**

**Yes = 1**

(b) If yes for (a) above, what was the specific course? *(Interviewer to fill table as appropriate)*

| <b>Course name</b> | <b>Duration (days)</b> | <b>Date (mm/yy)</b> | <b>Place (city,town)</b> | <b>Training institution/organization</b> |
|--------------------|------------------------|---------------------|--------------------------|------------------------------------------|
|                    |                        |                     |                          |                                          |
|                    |                        |                     |                          |                                          |
|                    |                        |                     |                          |                                          |

7. (a) Which training method for STDs management would you most prefer?

Off-site training workshop/seminar = 1

On-job mentoring = 2

Online self-learning course = 3

Others = 4, specify:

---

(b) Briefly explain why:

---



---

## **SECTION II: HEALTH FACILITY OPERATIONS**

*Now I will go to questions regarding general operations in your health facility...*

8. (a) How many other people work in this health facility?      |\_|\_|

(b) What type of health care training have the other staff members completed? (*Interviewer to fill table as appropriate*)

| No. of staff | Type of training completed (Medical/clinical, pharmacy, nursing, laboratory, others) | Level reached ( <i>certificate, diploma, higher diploma, bachelors, masters</i> ) | Years completed |
|--------------|--------------------------------------------------------------------------------------|-----------------------------------------------------------------------------------|-----------------|
|              |                                                                                      |                                                                                   |                 |
|              |                                                                                      |                                                                                   |                 |
|              |                                                                                      |                                                                                   |                 |
|              |                                                                                      |                                                                                   |                 |

9. What are the opening hours of your health facility? (*Interviewer to fill table as appropriate*)

| Days/ Time       | From | To |
|------------------|------|----|
| Monday to Friday |      |    |
| Saturday         |      |    |
| Sunday           |      |    |
| Public holidays  |      |    |

10. (a) What reference materials do you have in your health facility? (*Interviewer to indicate whether materials seen or not*)

| Reference material (indicate whether hard copy or electronic) | Year of issue/ publication | Not seen = 0, Seen = 1 |
|---------------------------------------------------------------|----------------------------|------------------------|
|                                                               |                            |                        |
|                                                               |                            |                        |
|                                                               |                            |                        |

(b) How can you access internet in your health facility?

---



---

11. (a) Approximately, how many patients are seen in your health facility per day?

|\_|\_|\_| **Patients**

(b) Of these, approximately how many are regular patients (at least 2 visits)?

|\_|\_|\_| **Patients**

12. (a) Apart from consultation, what other services do you offer? (tick all that apply)

**Laboratory**

**X-ray**

**Pharmacy**

**Family planning**

**Mother child health**

**HIV testing, Specify:** \_\_\_\_\_

**Comprehensive care clinic (CCC) for HIV/AIDS**

**Others (specify)**

---



---

13. (a) What tests do you do for Malaria? (tick all that apply)

**None**

**Rapid diagnostic tests (RDT)**

**Microscopy**

(b) (i) In a week, how many adult patients are treated for malaria in your clinic?

|\_|\_|\_| **Adult patients**

(ii) How many of these will have tested positive for malaria?

|\_|\_|\_| **Adult patients**

14. On average, how much do you charge per consultation?

|\_|\_|\_| **Kshs.**

### **SECTION III: STANDARDS AND PRACTICES FOR STDs**

***Next, we will look at the questions concerning STDs...***

15. Consider this case;

A man presents to your health facility with a thick yellow green discharge from his penis. He also reports that he feels pain and a burning sensation when urinating.

(a) What questions would you ask the client?

---

---

---

---

---

(b) How would you treat the client?

| <b>Drug</b> | <b>Dose</b> | <b>Frequency</b> | <b>Duration (days)</b> | <b>Total Cost (Kshs)</b> |
|-------------|-------------|------------------|------------------------|--------------------------|
|             |             |                  |                        |                          |
|             |             |                  |                        |                          |
|             |             |                  |                        |                          |

(c) What advice would you give to the client?

---

---

---

16. (a) Do you have guidelines for the management of STDs in your health facility?

**No = 0**

**Yes = 1**

(b) If yes, may I see the guidelines? (*Interviewer to fill table as appropriate*)

| <b>Author/ Issuer</b> | <b>Year of publication</b> | <b>Not seen = 0<br/>Seen = 1</b> |
|-----------------------|----------------------------|----------------------------------|
|                       |                            |                                  |
|                       |                            |                                  |

17. (a) Do you have a flow chart for the management of STDs in your health facility?

**No = 0**

**Yes = 1**

(b) If yes for (a) above, may I please see the flow chart? (*Interviewer to fill table as*)

| <b>Author/ Issuer</b> | <b>Year of publication</b> | <b>Not seen = 0<br/>Seen = 1</b> |
|-----------------------|----------------------------|----------------------------------|
|                       |                            |                                  |
|                       |                            |                                  |

18. (a) Approximately how many patients with STDs do you see in a week?

|\_|\_|\_| **Patients**

(b) In a week, how many male adult patients are treated for urethral discharge in your clinic?

|\_|\_|\_| **Male adult patients**

19. (a) Do you have a pharmacy in your facility?

**No = 0**

**Yes = 1**

(b) If no for (a) above, do you dispense medicines for STD treatment in your health facility?

**No = 0**

**Yes = 1**

If yes, briefly describe:

---

(c) If yes for (a) or (b) above:

(i.) How does your facility ensure the quality of medicines stocked?

---

---

---

---

(ii.) Do you stock cefixime?

**No = 0**

**Yes = 1**

If yes, what is the cost of one 400mg oral dose?

|\_|\_|\_|\_| **Kshs.**

20. What conditions do you treat with cefixime?

---

---

---

---

21. Consider this case;

An adult client presents to your health facility with fever, body aches and diarrhoea. The client also reports feeling tired and loss of appetite. The symptoms have lasted for about one week now.

(a) What are the likely diseases the client could be suffering from?

---

---

---

---

(b) What would you do to establish the diagnosis?

---

---

---

---

(c) The client also reports having had unprotected sexual intercourse in the last one month;

(i) What would you now think about the likely diagnosis?

---

---

---

(ii) What would you do now to establish the diagnosis?

---

---

---

(d) How would you manage the client?

---

---

---

---

(e) What other advice would you give the client?

---

---

---

---

(f) What percentage (%) of people, who become HIV infected, do you think will have some of the symptoms mentioned above, 2-3 weeks after infection?

|\_|\_|\_|%

22. (a) Do you provide antiretroviral therapy (ART) services in your health facility?

**No = 0**

**Yes = 1**

(b) If yes, which of these services do you provide? (*Tick all that apply*)

**Highly active antiretroviral therapy (HAART)**

**Prevention of mother to child transmission (PMTCT)**

**Post exposure prophylaxis (PEP)**

**Others, specify:**

---

---



23. (a) Do you get clients who ask for medicines they can take before sexual intercourse, to prevent HIV infection?

**No = 0**

**Yes = 1**

(b) If yes, what medicines do they ask for?

---

---

---

(c) How do you help them?

---

---

---

**FSW AND MSM ASPECTS**

***Now I would like to ask you a few questions regarding some groups of clients who have a high risk for STDs...***

24. (a) Do you think some of your clients do sex work?

**No = 0**

**Maybe = 1**

**Yes = 2**

(b) If yes or maybe, what makes you think they do sex work?

---

---

---

---

(c) If yes or maybe, what services or medicines or products do they ask for?

---

---

---

---

25. (a) Do you think some of your male clients have sex with other men?

**No = 0**

**Maybe = 1**

**Yes = 2**

(b) If yes or maybe, what makes you think they have sex with other men?

---

---

---

---

(c) If yes or maybe, what services/medicines/ products do they ask for?

---

---

---

---

26. Apart from the symptoms that appear on the penis or vagina, where else may STD symptoms present?

---

---

---

---

27. Consider this case;

A client presents with rectal discharge, anal itching, rectal bleeding and painful bowel movements.

(a) What are the likely conditions the client could be suffering from?

---

---

---

---

(b) How would you manage the client? (**Management includes treatment, advice given, referrals e.t.c.**)

---

---

---

---

---

---

**Now, I would like to ask you a few questions about barriers in STD management in your health facility...**

28. (a) Do you experience any barriers or difficulties translating your knowledge of managing STDs into practice?

**No = 0**

**Yes = 1**

(b) If yes, describe?

---

---

---

---

(c) How do you think these barriers or difficulties can be overcome?

---

---

---

---

29. Finally, do you have any information you would like to add regarding the issues we have discussed during the entire interview?

---

---

---

---

---

---

**Finishing time |\_\_|\_\_ |\_\_|\_\_| hours**

***Thank you once again for finding time for this interview and for your patience through the whole process!***
